# Supplementary material for: A database of glacier microbiomes for the Three Poles
Source: Copernicus journal article supplement (doi:10.5194/essd-2023-395), 2023-12-01
Supplement: Supplementary file 1 [file supplementary figures 20230521.docx]

Supplementary File for

**A dataset of glacier microbiomes for the Three Poles**

Yongqin Liu1,2,3*, Songnian Hu3,4, Tao Yu3,4, Yingfeng Luo3,4, Zhihao Zhang2,3, Yuying Chen2,3, Shunchao Guo4,5,6, Qinglan Sun4,5,6, Guomei Fan4,5,6, Linhuan Wu4,5,6, Juncai Ma4,5,6, Keshao Liu2, Pengfei Liu1, Junzhi Liu1, Ji Mukan1*

1. Center for Pan-third Pole Environment, Lanzhou University, Lanzhou, China
2. State Key Laboratory of Tibetan Plateau Earth System, Resources and Environment (TPESRE), Institute of Tibetan Plateau Research, Chinese Academy of Sciences, Beijing, China
3. University of Chinese Academy of Sciences, Beijing, China
4. State Key Laboratory of Microbial Resources, Institute of Microbiology, Chinese Academy of Sciences, Beijing, China
5. Microbial Resource and Big Data Center, Institute of Microbiology, Chinese Academy of Sciences, Beijing, China
6. Chinese National Microbiology Data Center (NMDC), Beijing, China

*Corresponding authors

Yongqin Liu (yql@lzu.edu.cn)

Mukan Ji (jimk@lzu.edu.cn)


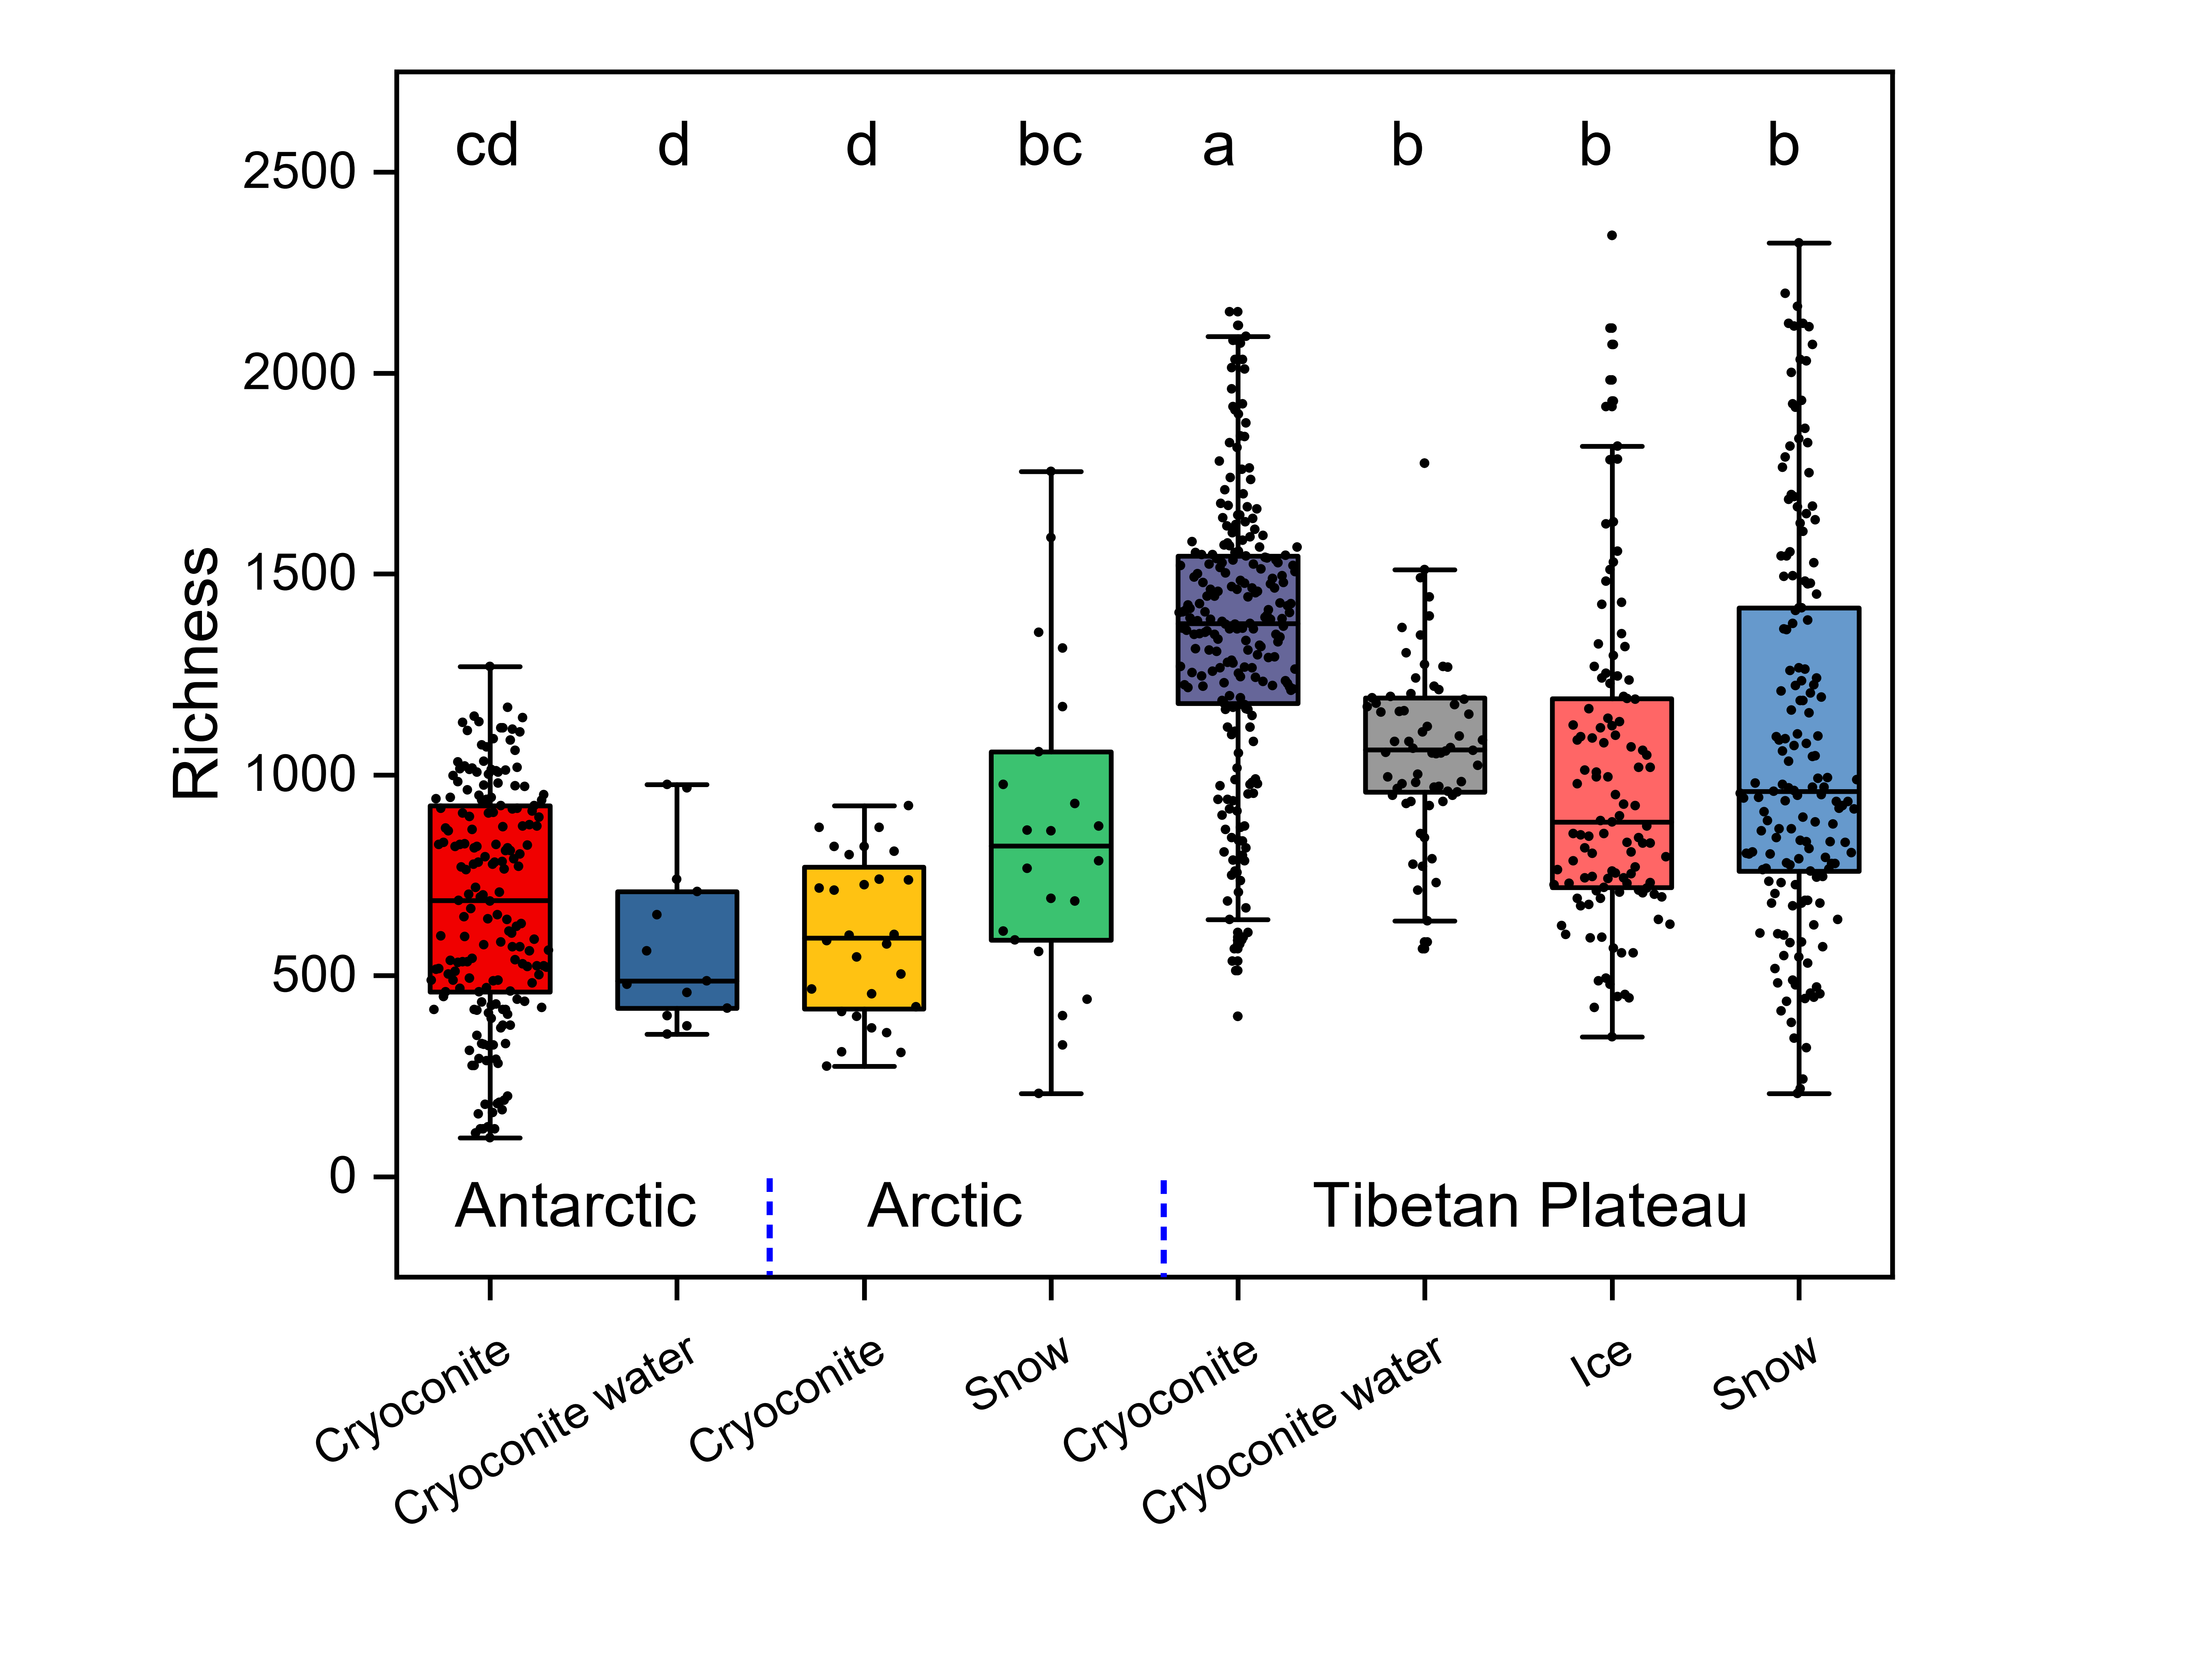


Fig. S1 Comparison of microbial (bacteria and archaea) richness across different habitat-region combinations. Letters indicate significance at *P* < 0.05, significance is based on Dunn’s post-hoc test with Bonfferoni’s correction.


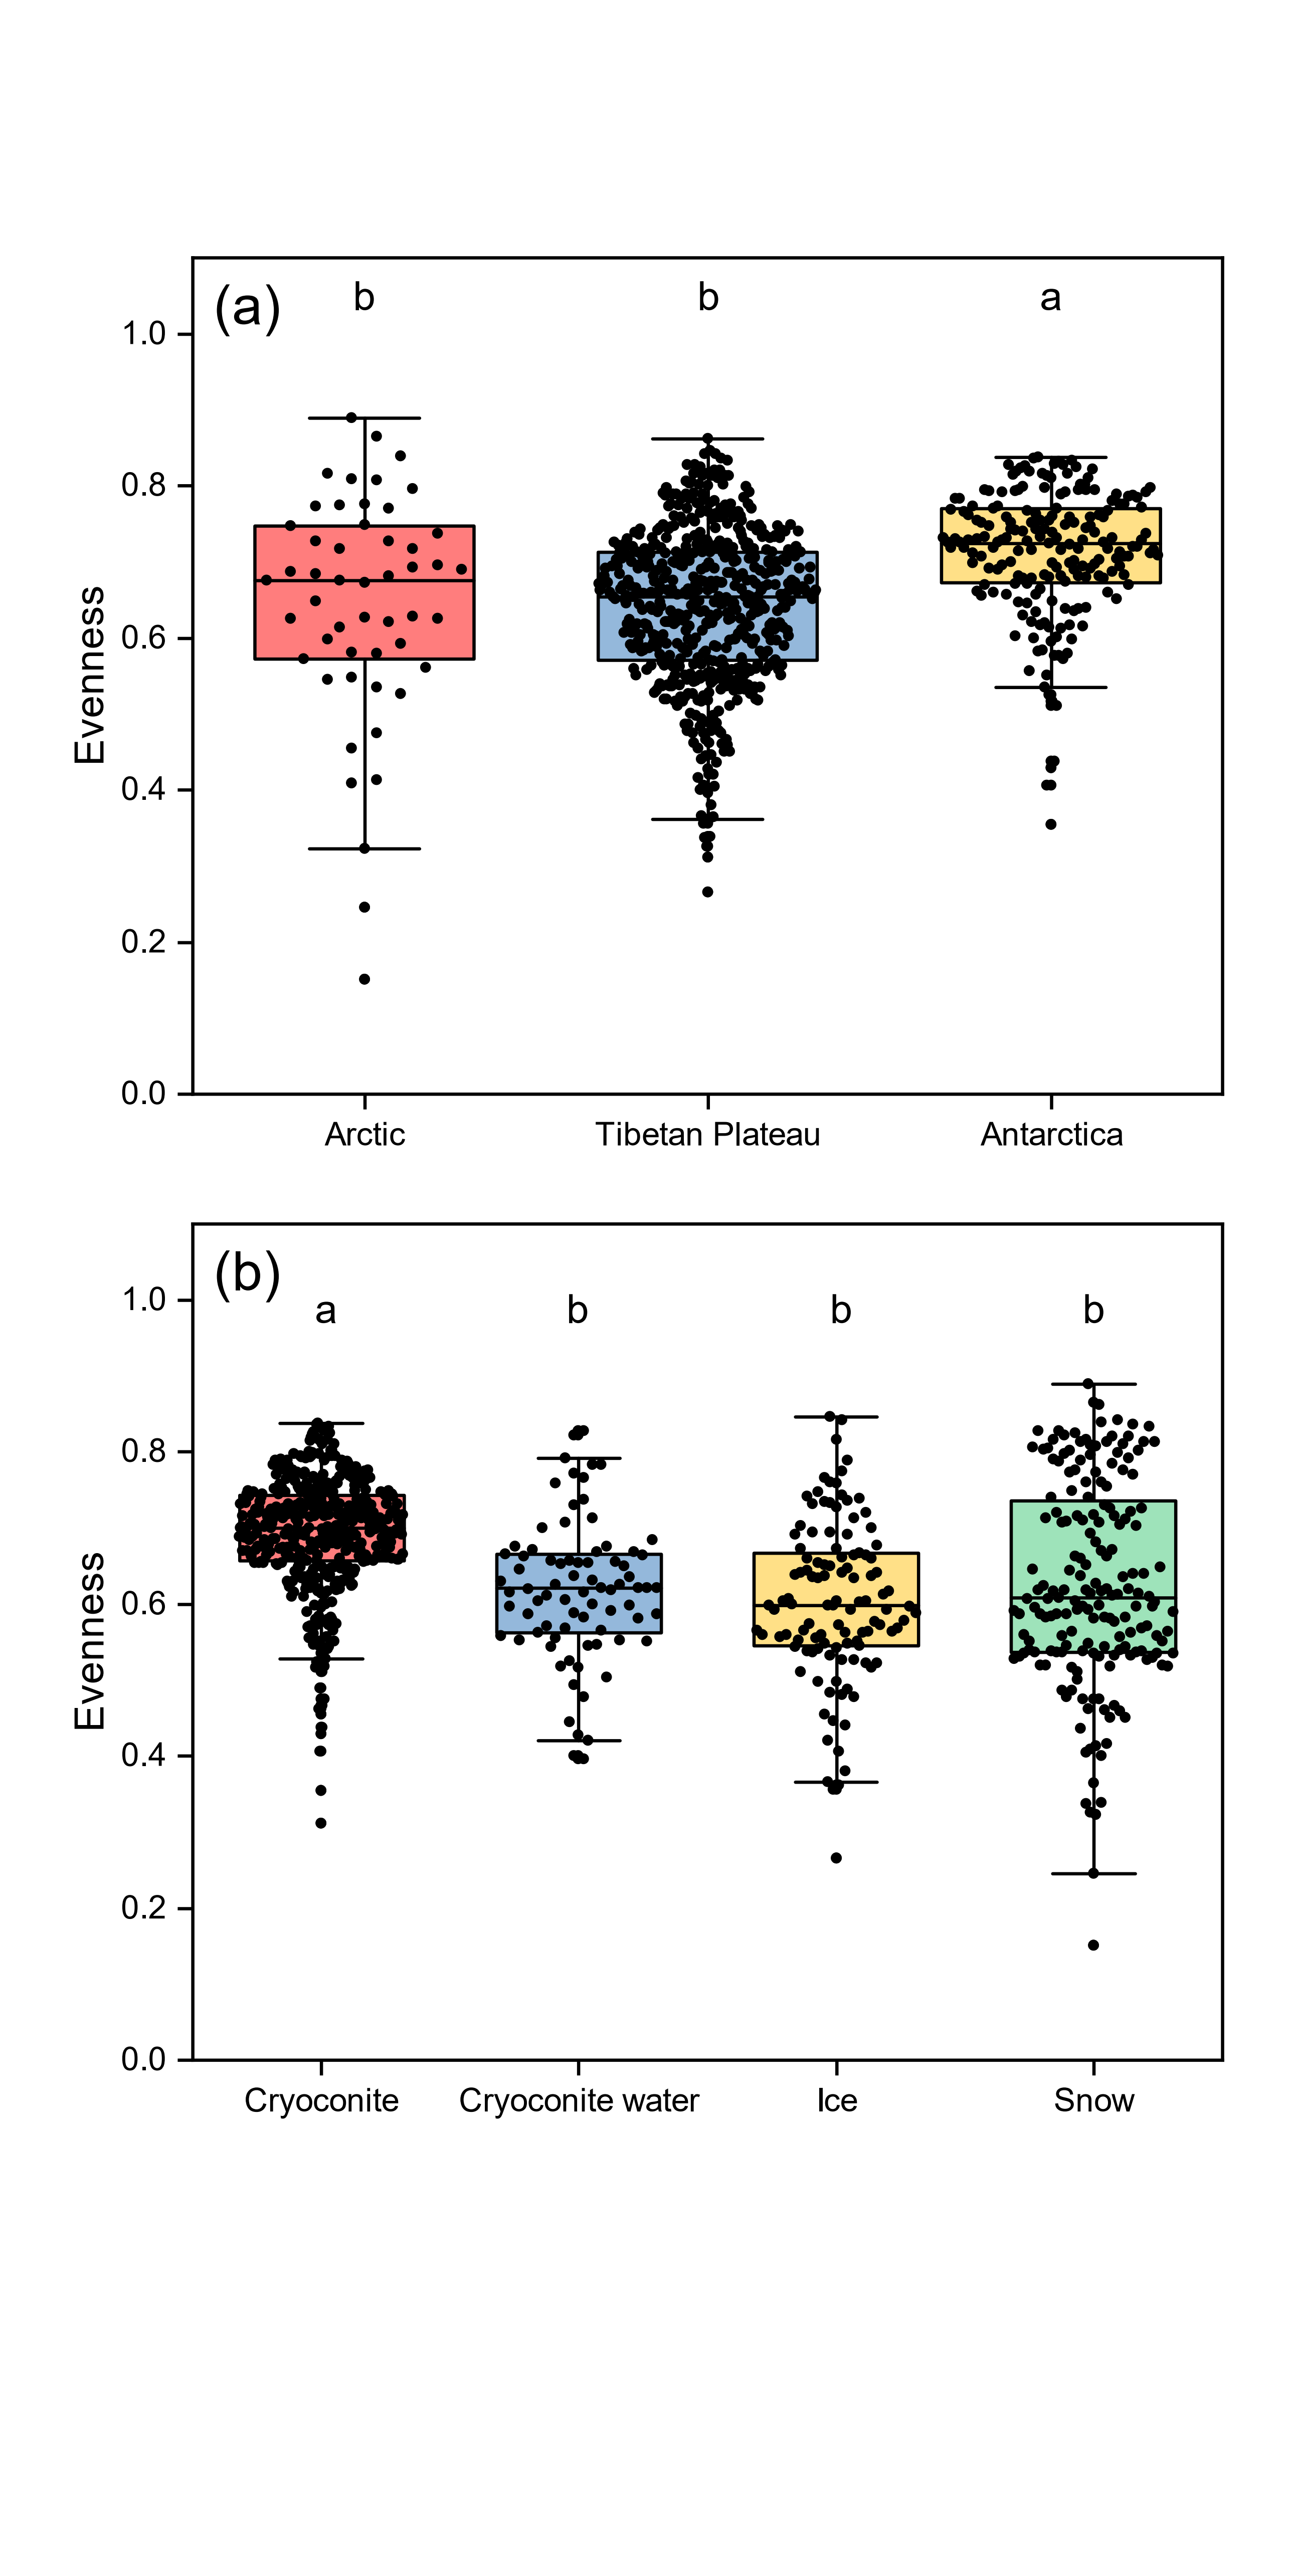


Fig. S2 Microbial (bacteria and archaea) evenness comparison by region (a) and habitats (b). Letters indicate significance at *P* < 0.05, significance is based on Dunn’s post-hoc test with Bonfferoni’s correction.


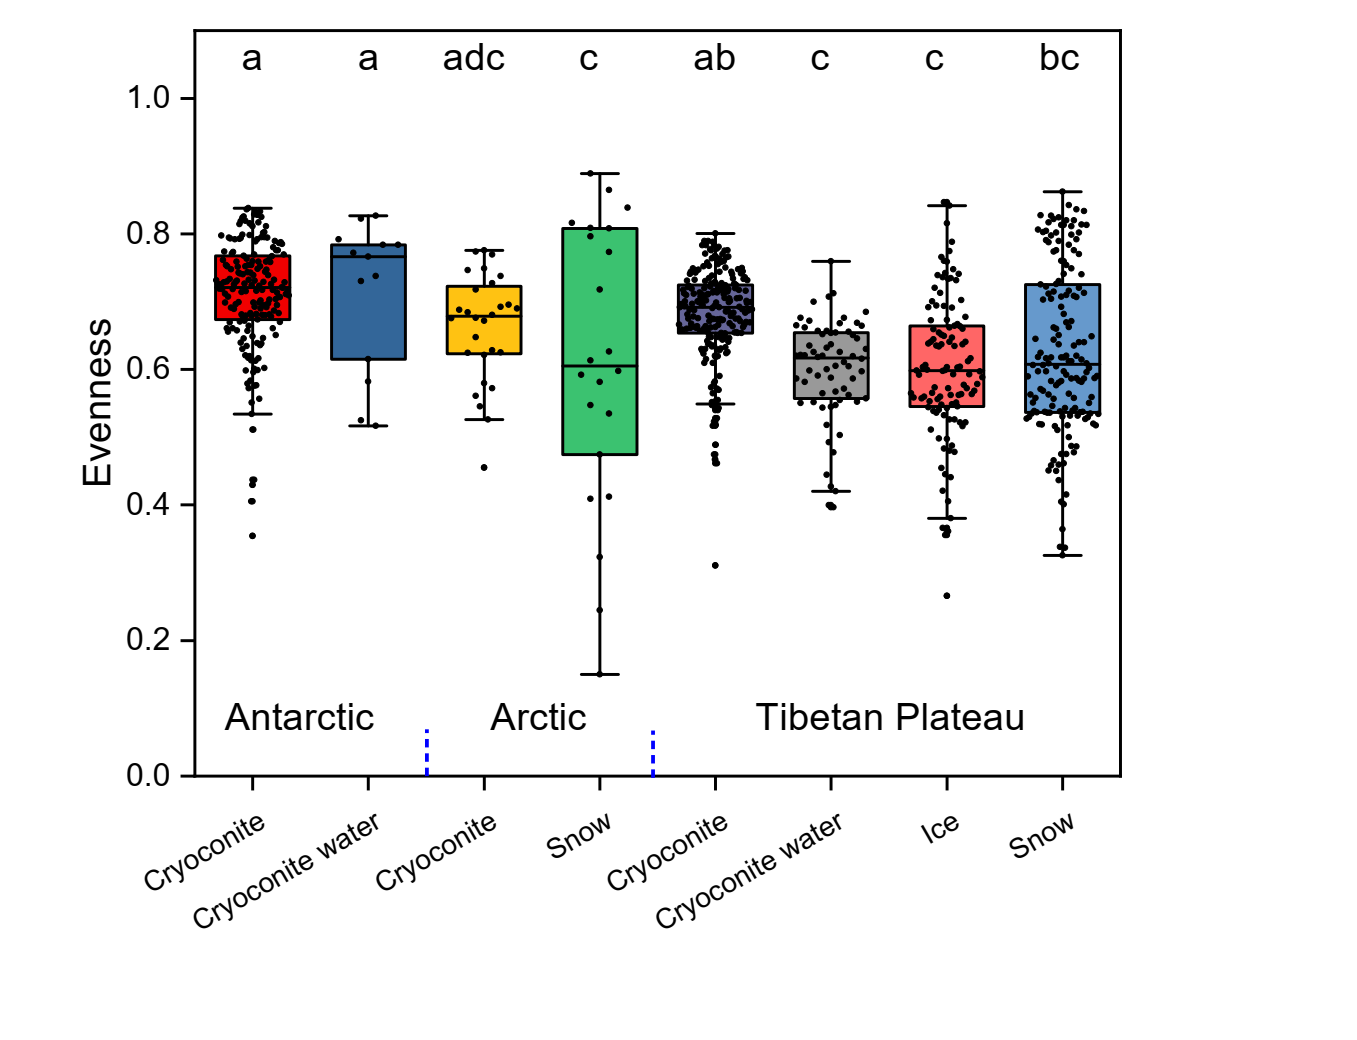


Fig. S3 Microbial evenness (bacteria and archaea) comparison among different habitat-region combinations. Letters indicate significance at *P* < 0.05, significance is based on Dunn’s post-hoc test with Bonfferoni’s correction.


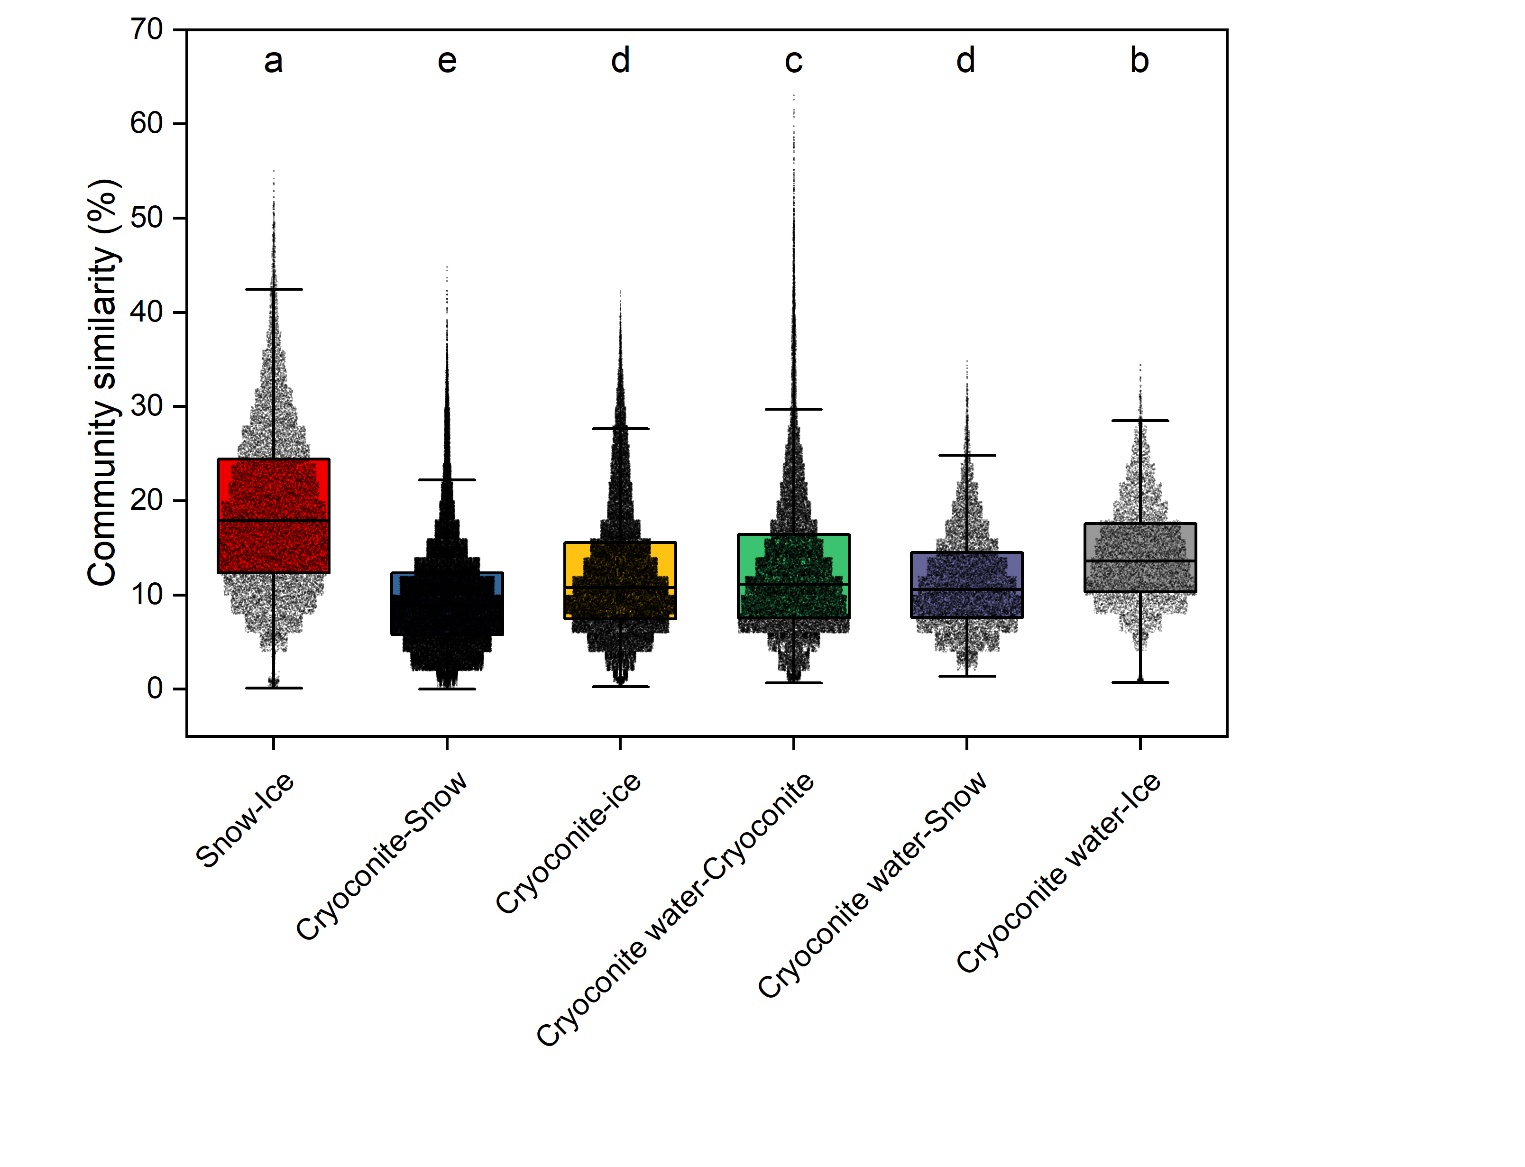


Fig. S4 Within group community similarity comparison among different habitat-region pairs. For box plot, minimum value, lower quartile, median value, mean value, upper quartile, and max value are shown. Significance is based one PERMANOVA pairwise test.


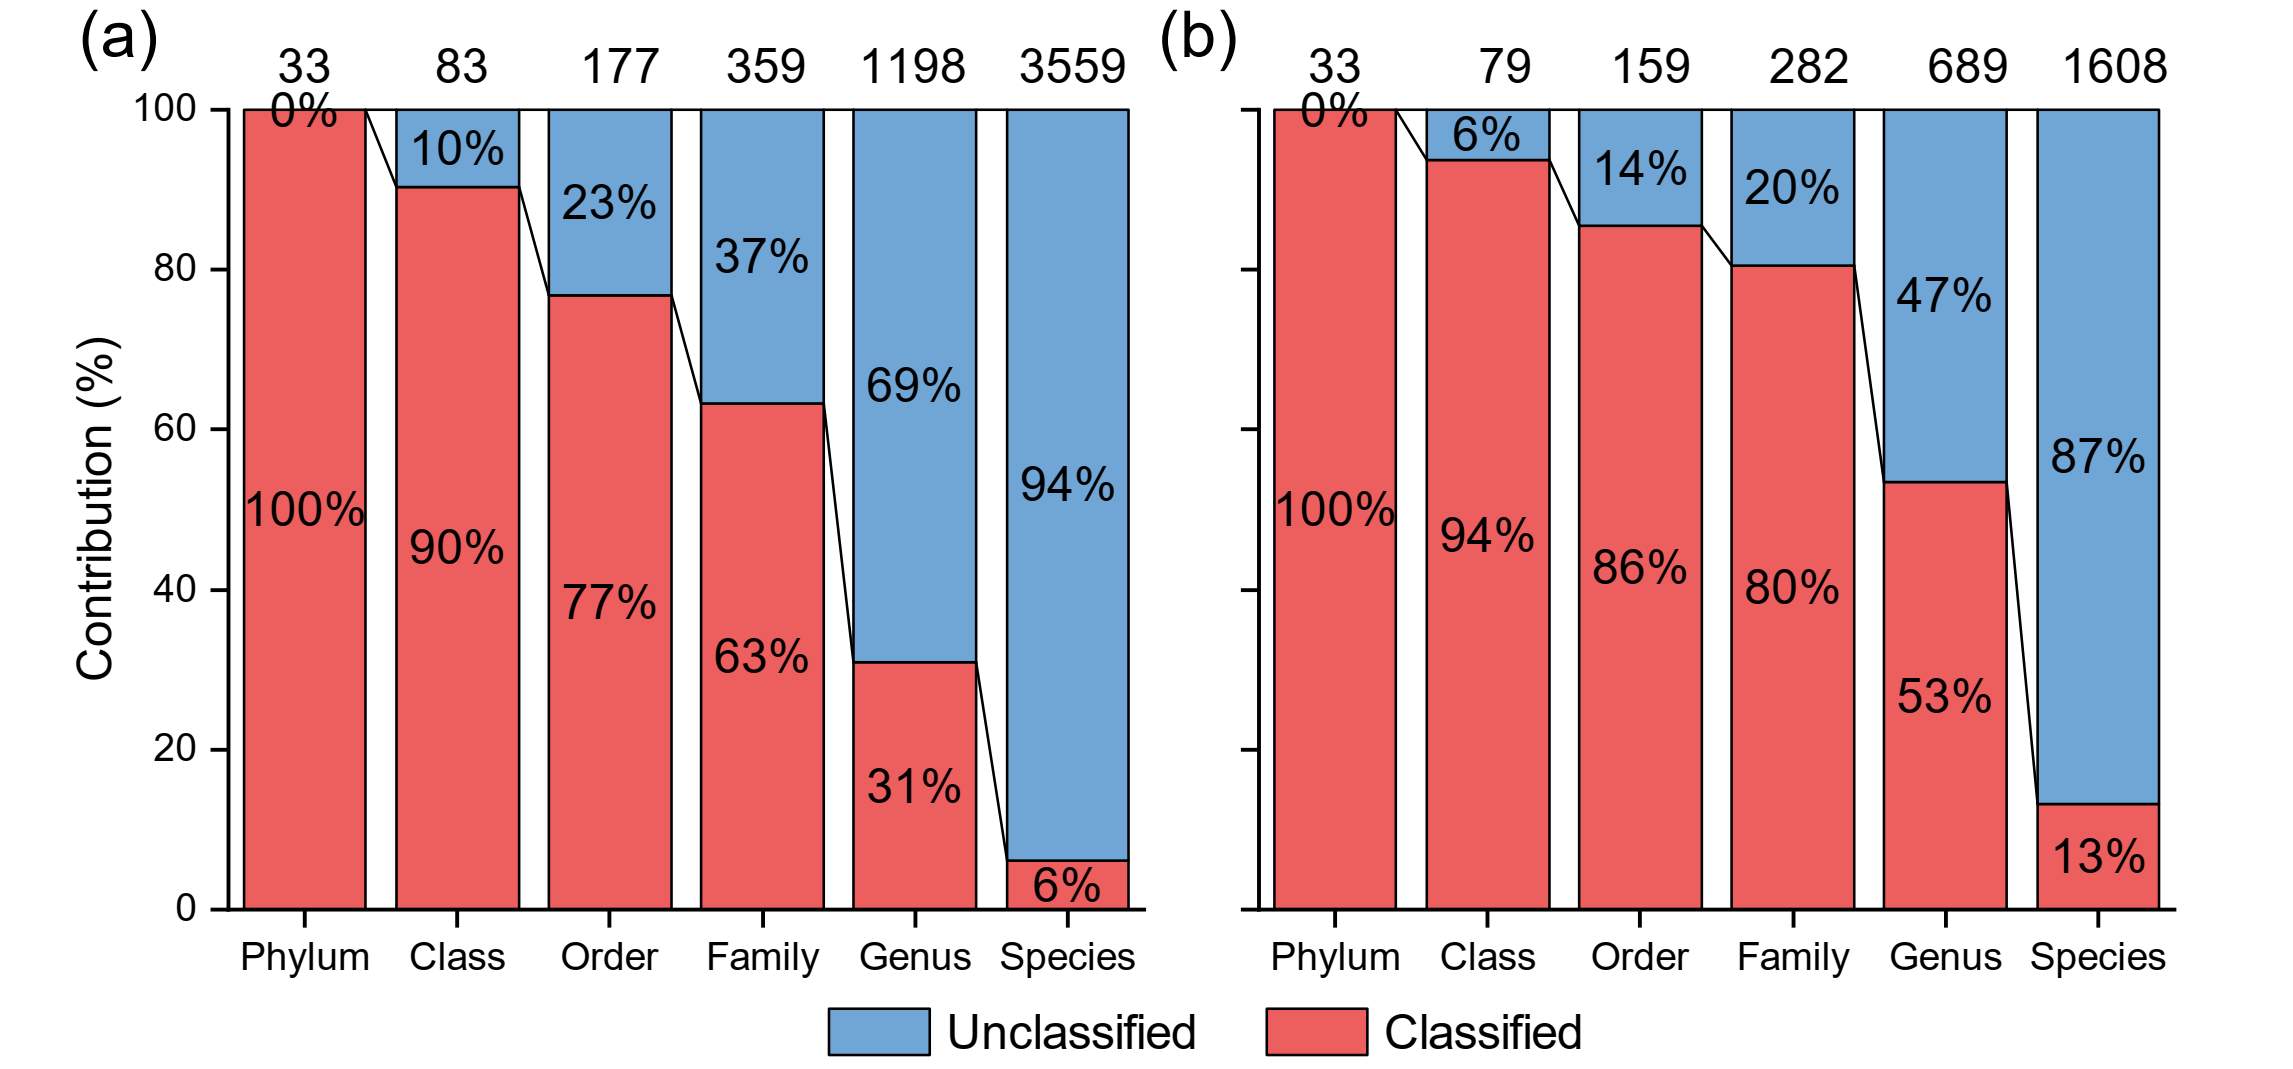


Fig. S5 phylotype numbers and novelty percentage.


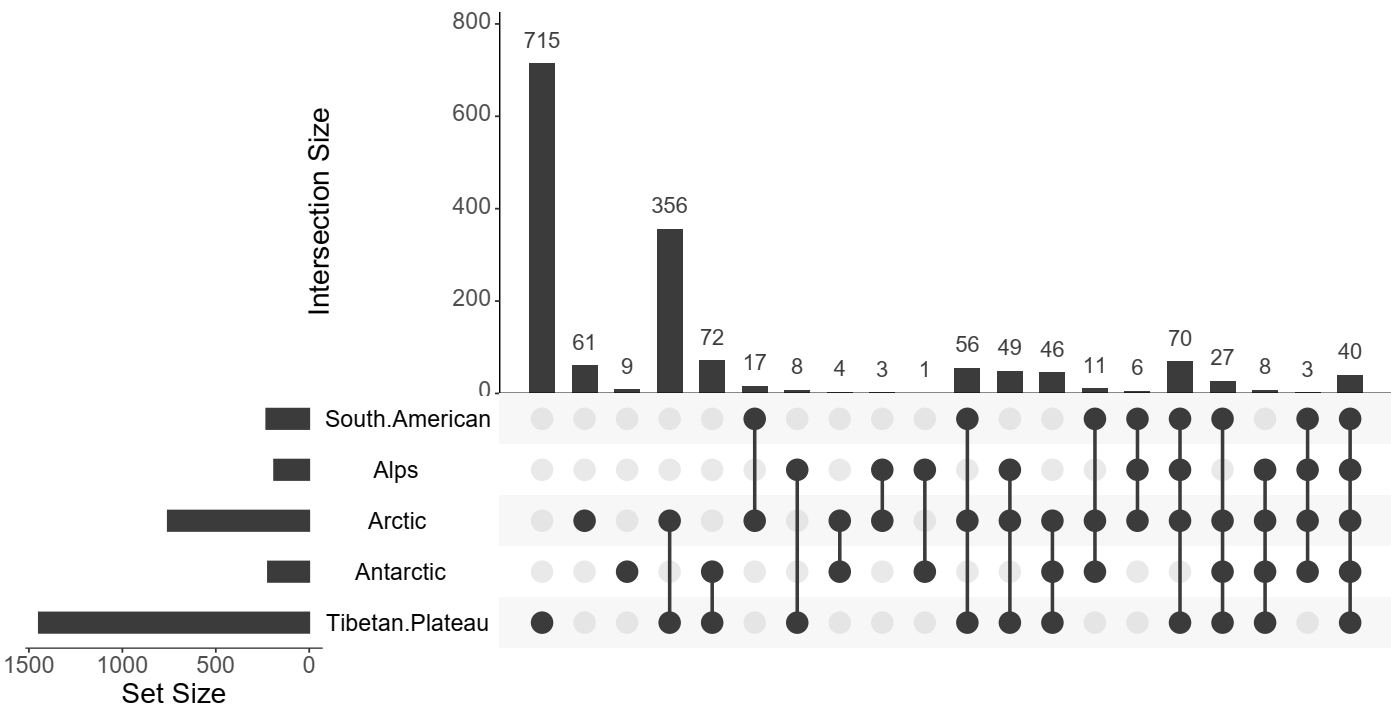

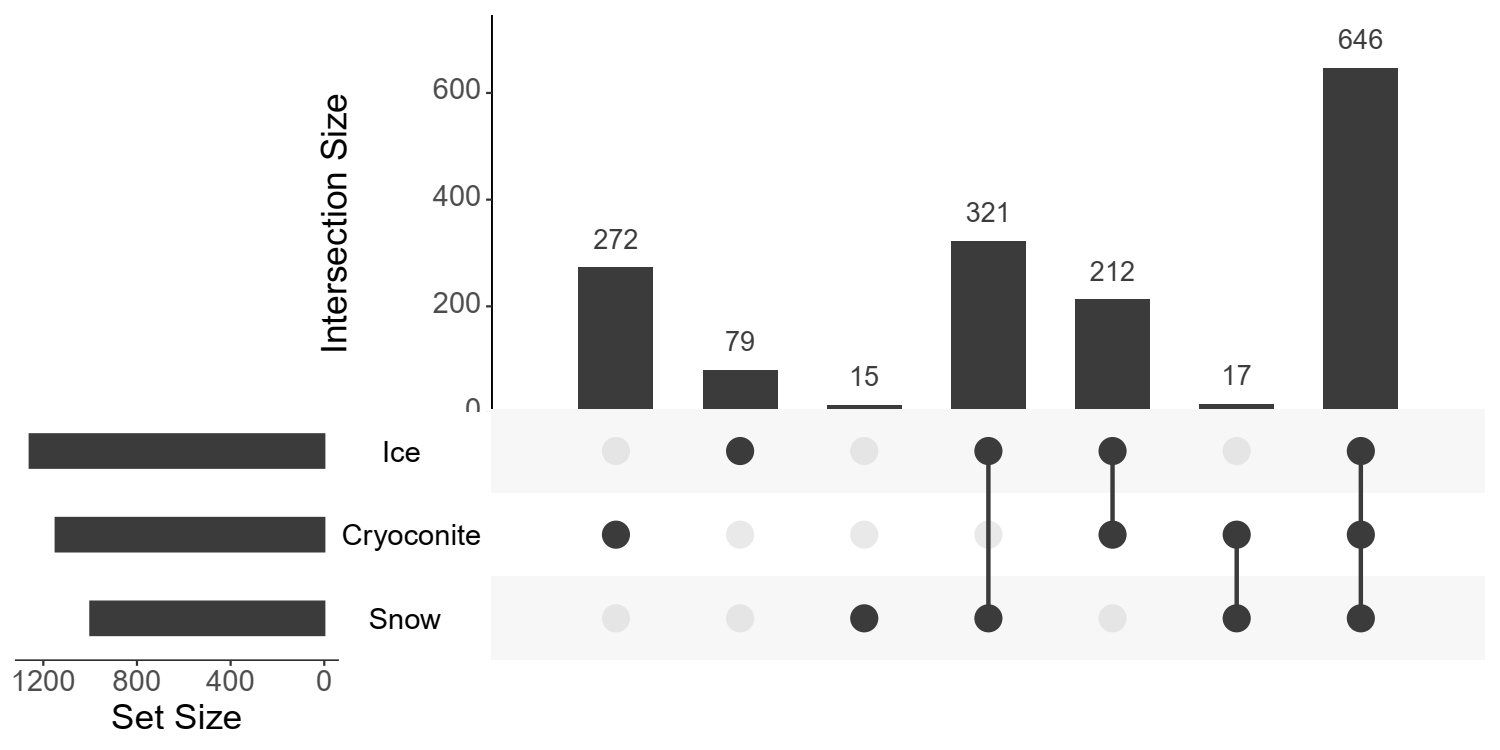


Fig. S6 The upset plot shows the distribution of the dereplicated microbial (bacterial and archaeal) genomes by region (A) and by habitat (B).
