# Supplementary material for: A database of glacier microbiomes for the Three Poles
Source: Copernicus journal article supplement (doi:10.5194/essd-2023-395), 2023-12-01

A

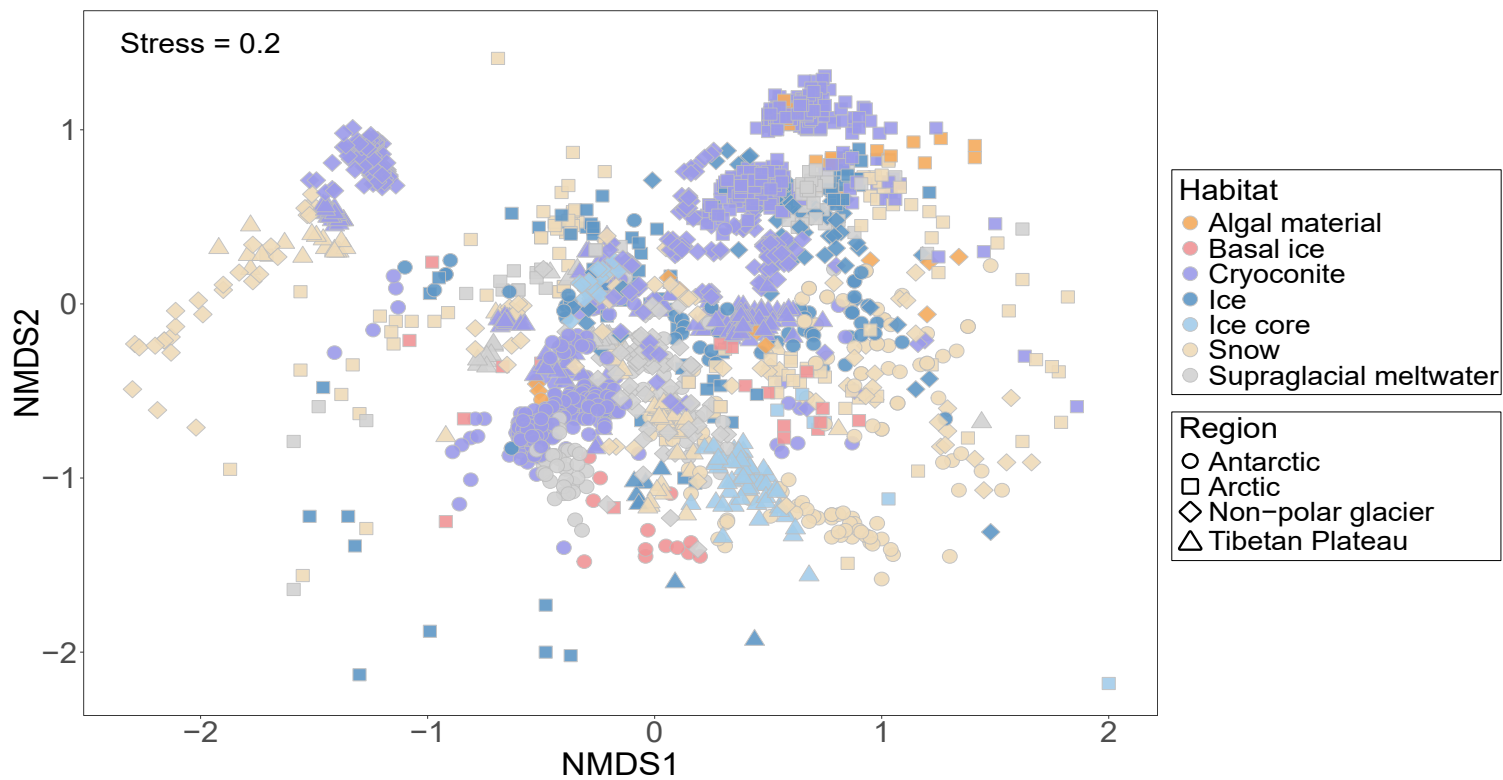

B

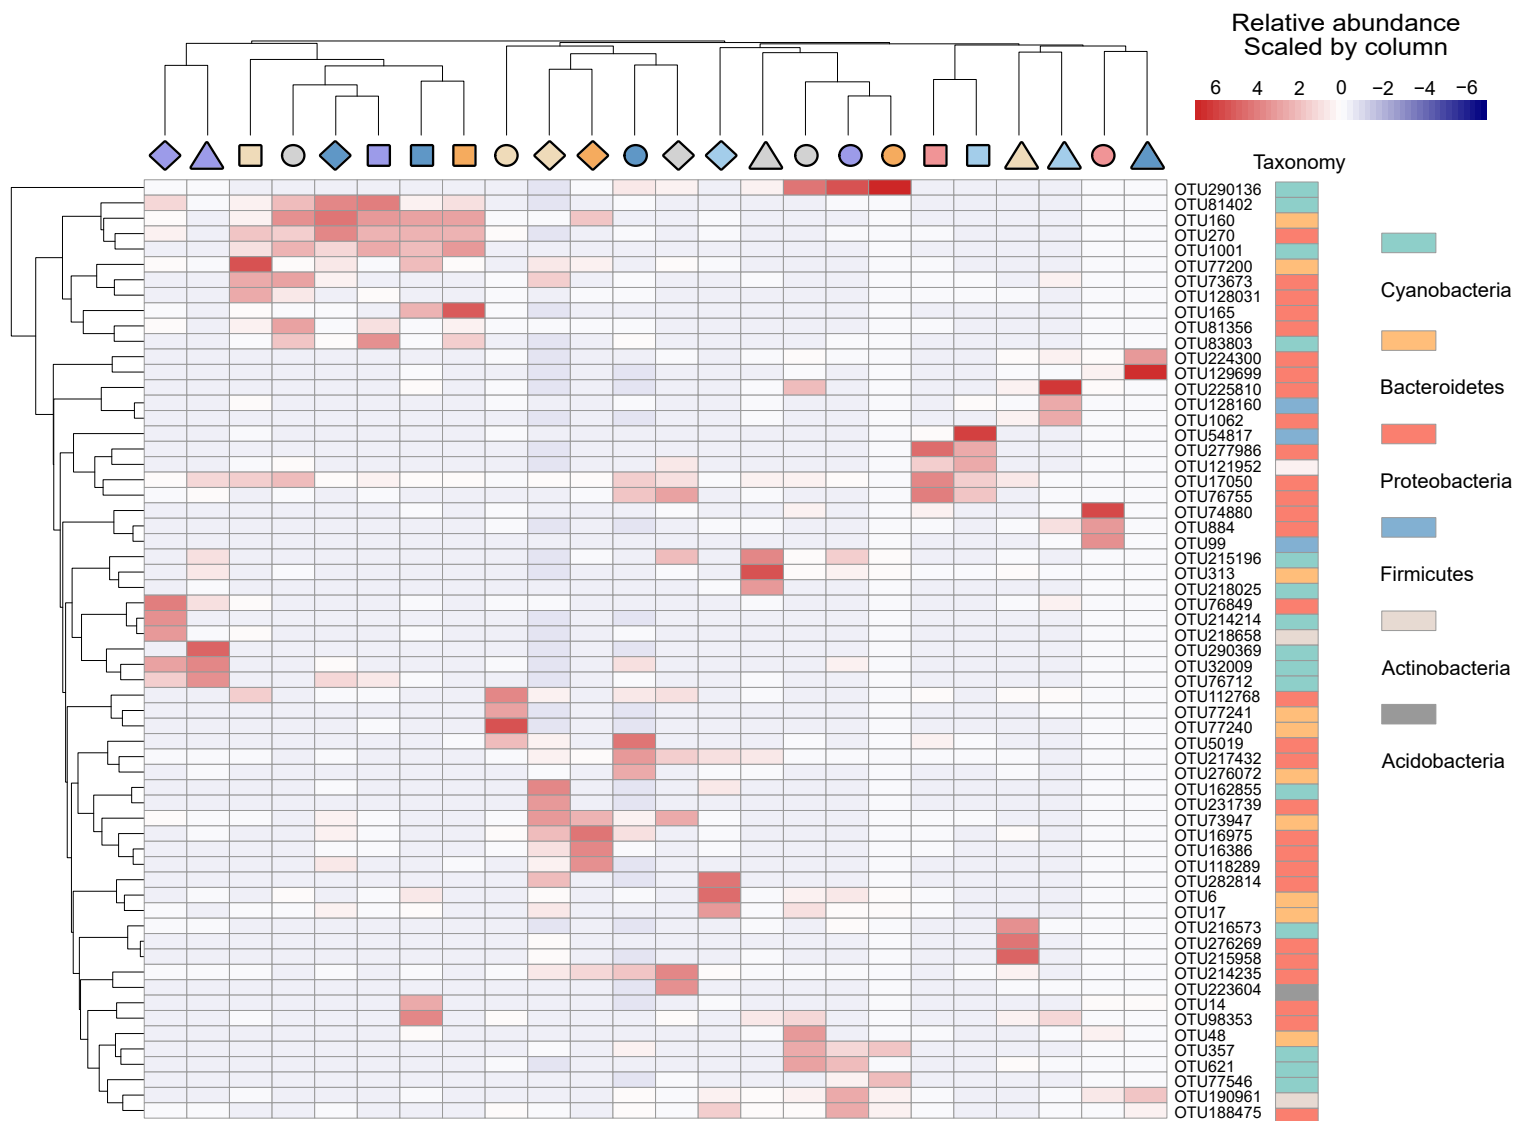

Supplement: Supplementary file [file essd-2023-395-AC1-supplement.pdf]
