# Supplementary material for: A database of glacier microbiomes for the Three Poles
Source: Copernicus journal article supplement (doi:10.5194/essd-2023-395), 2023-12-01

(a)

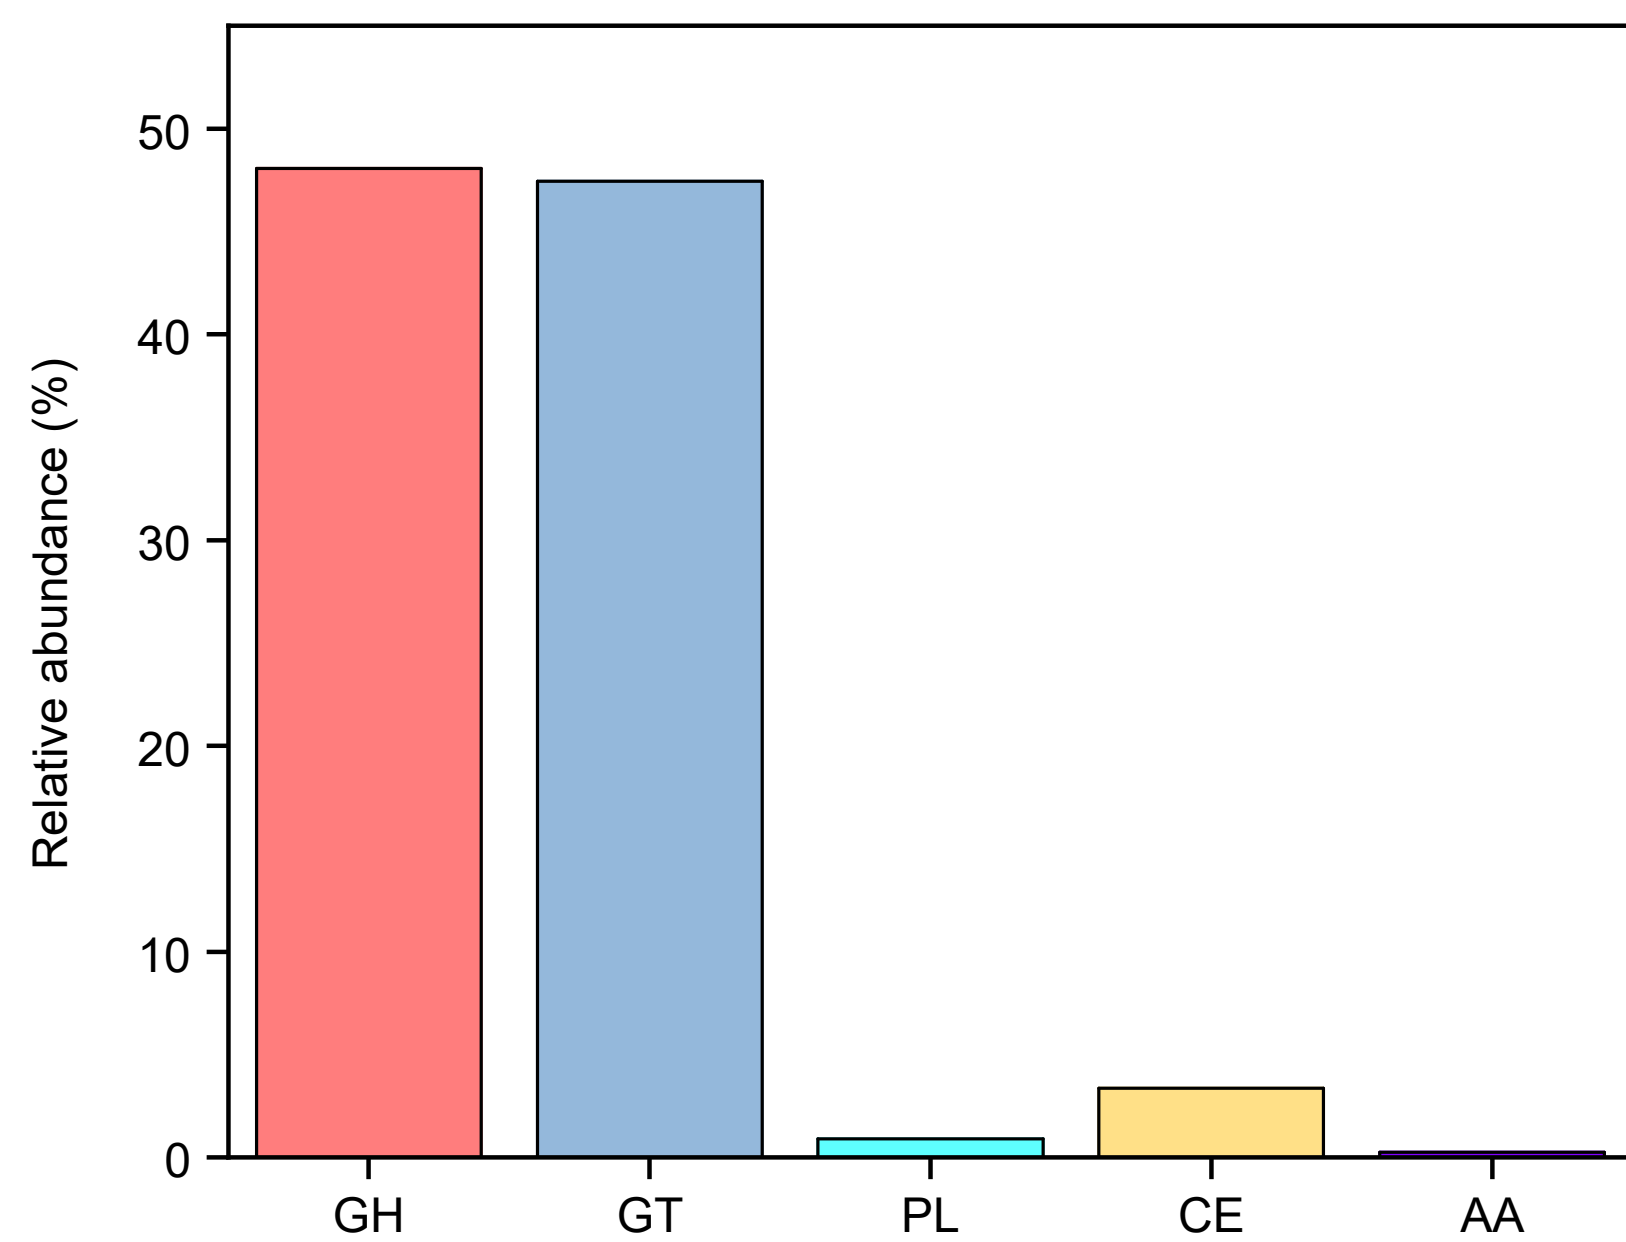

(b)

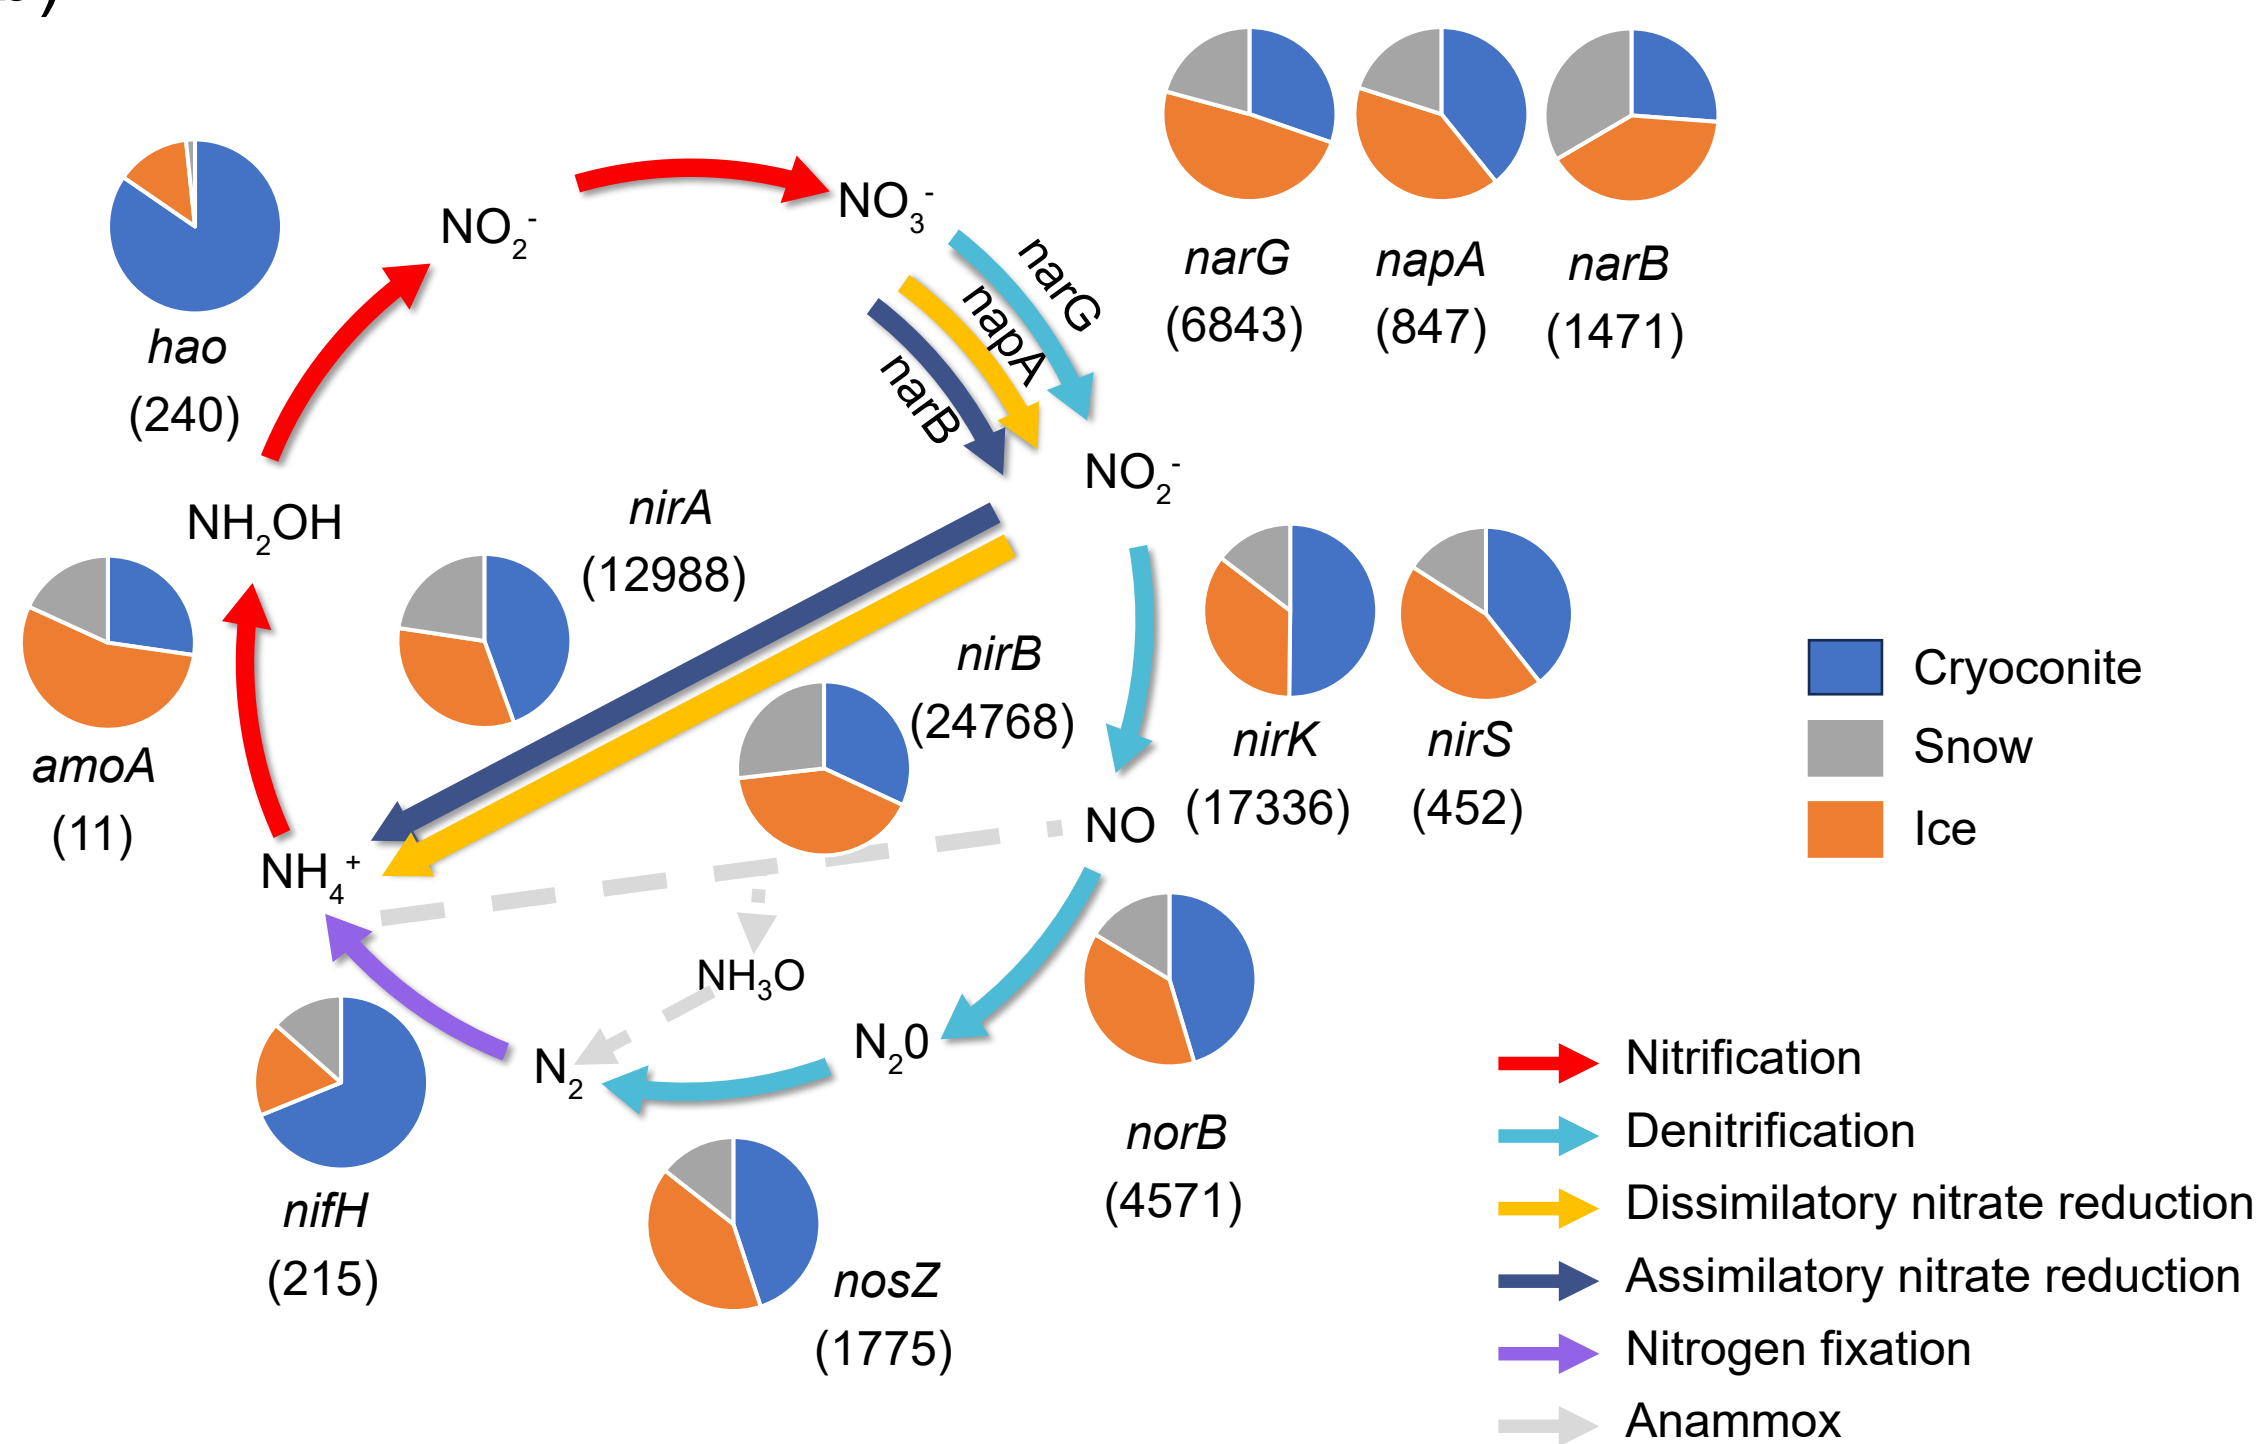

(c)

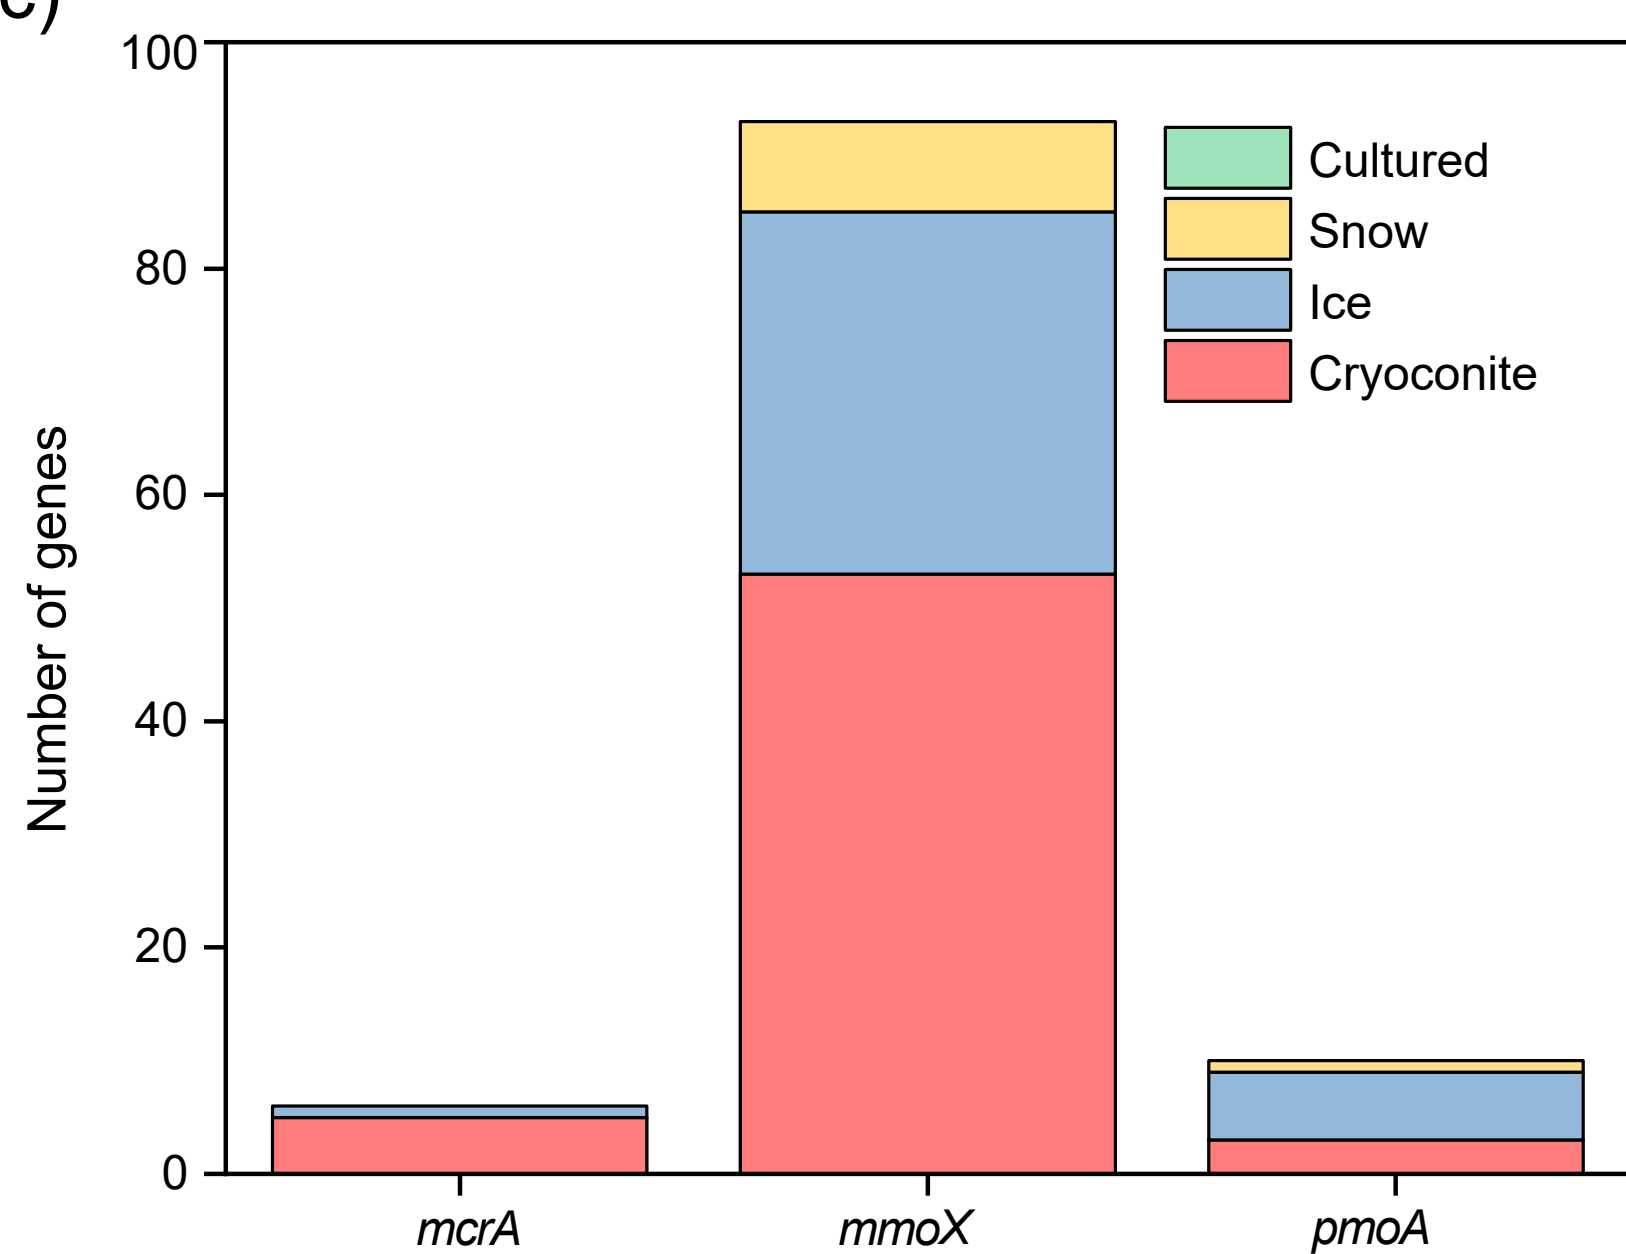

(d)

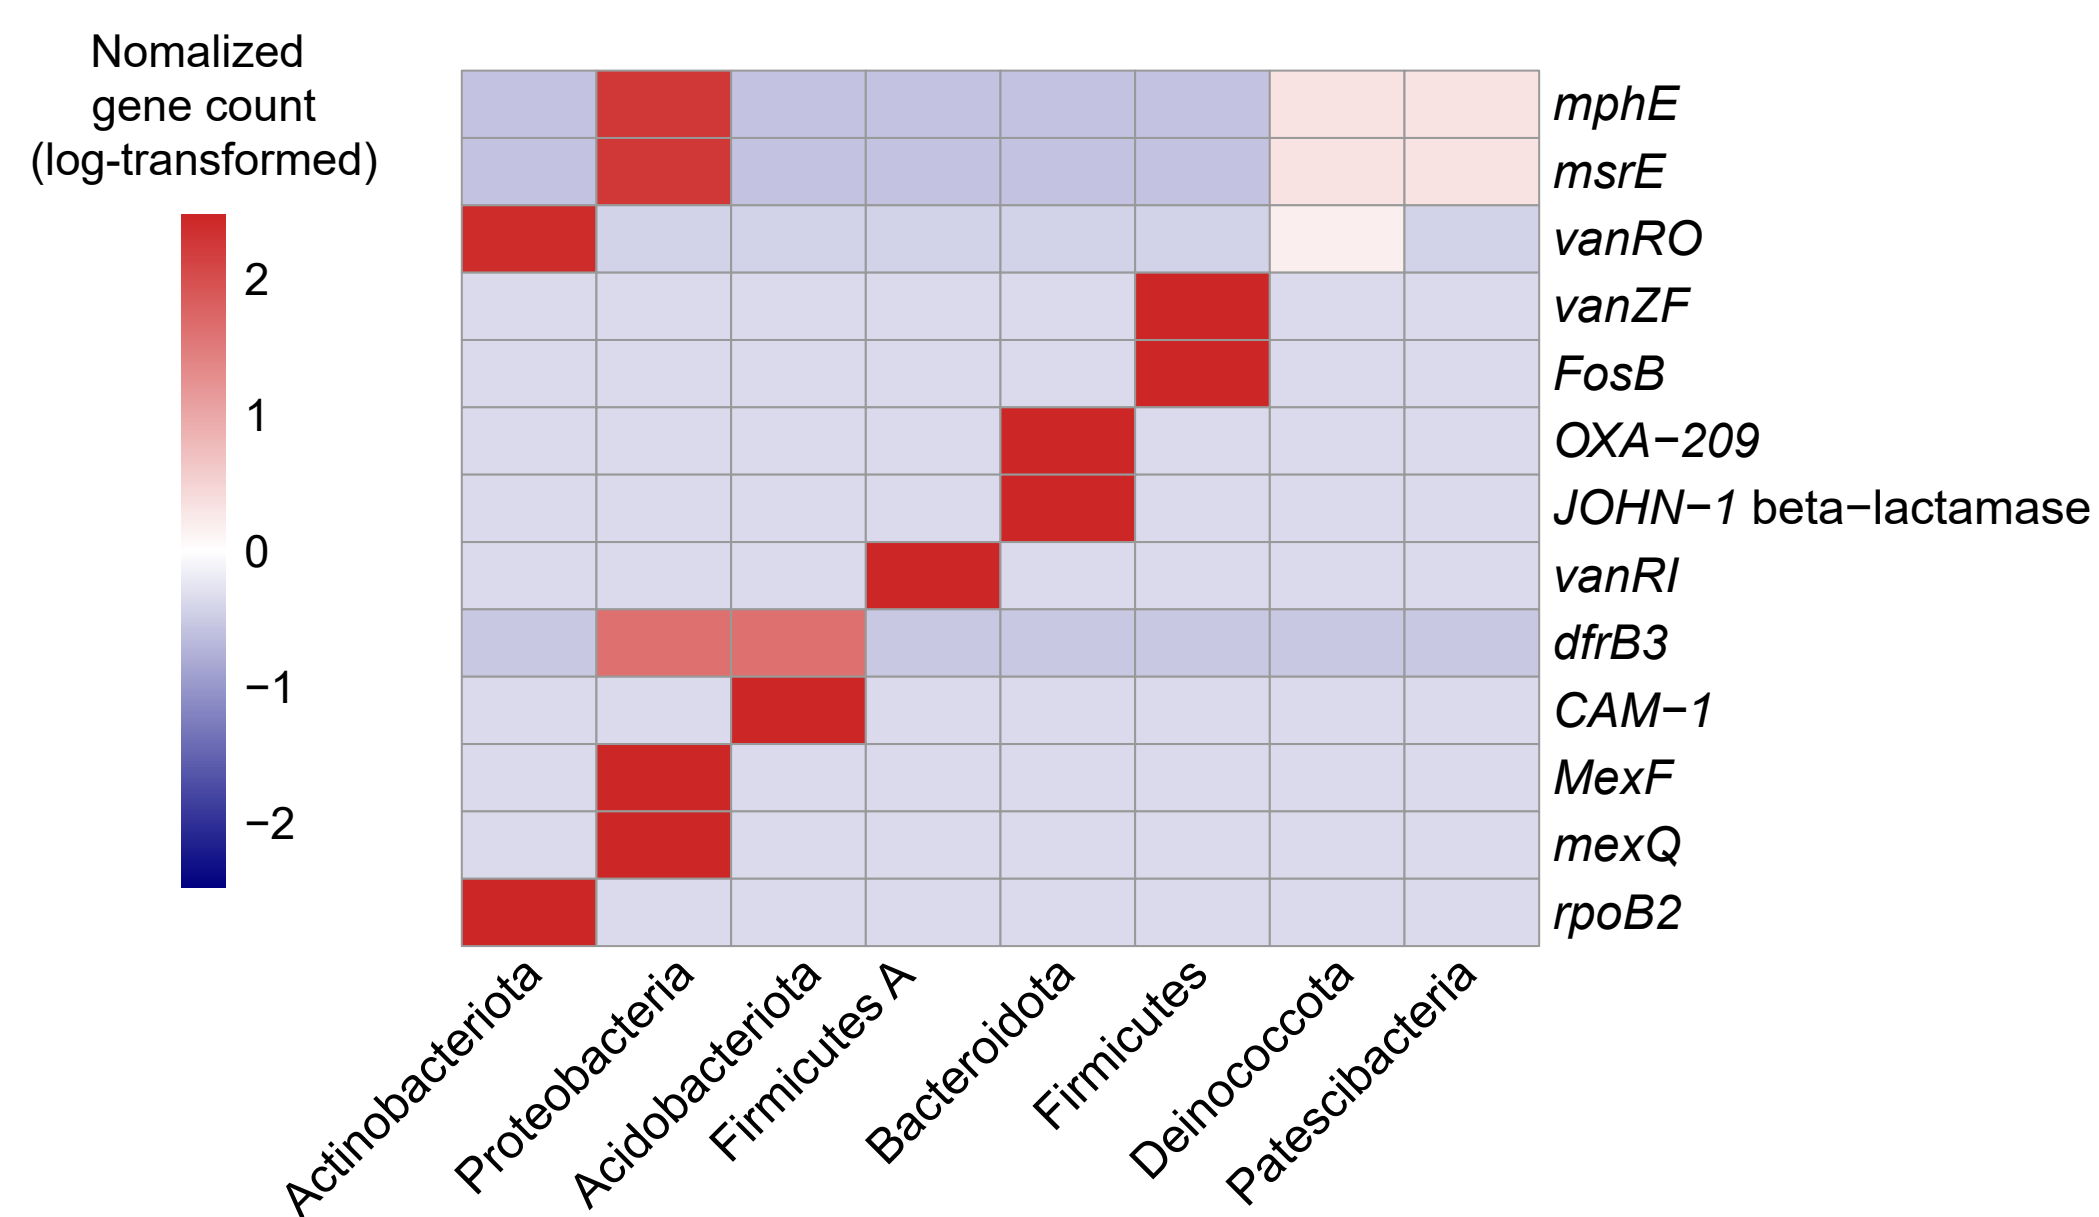

(e)

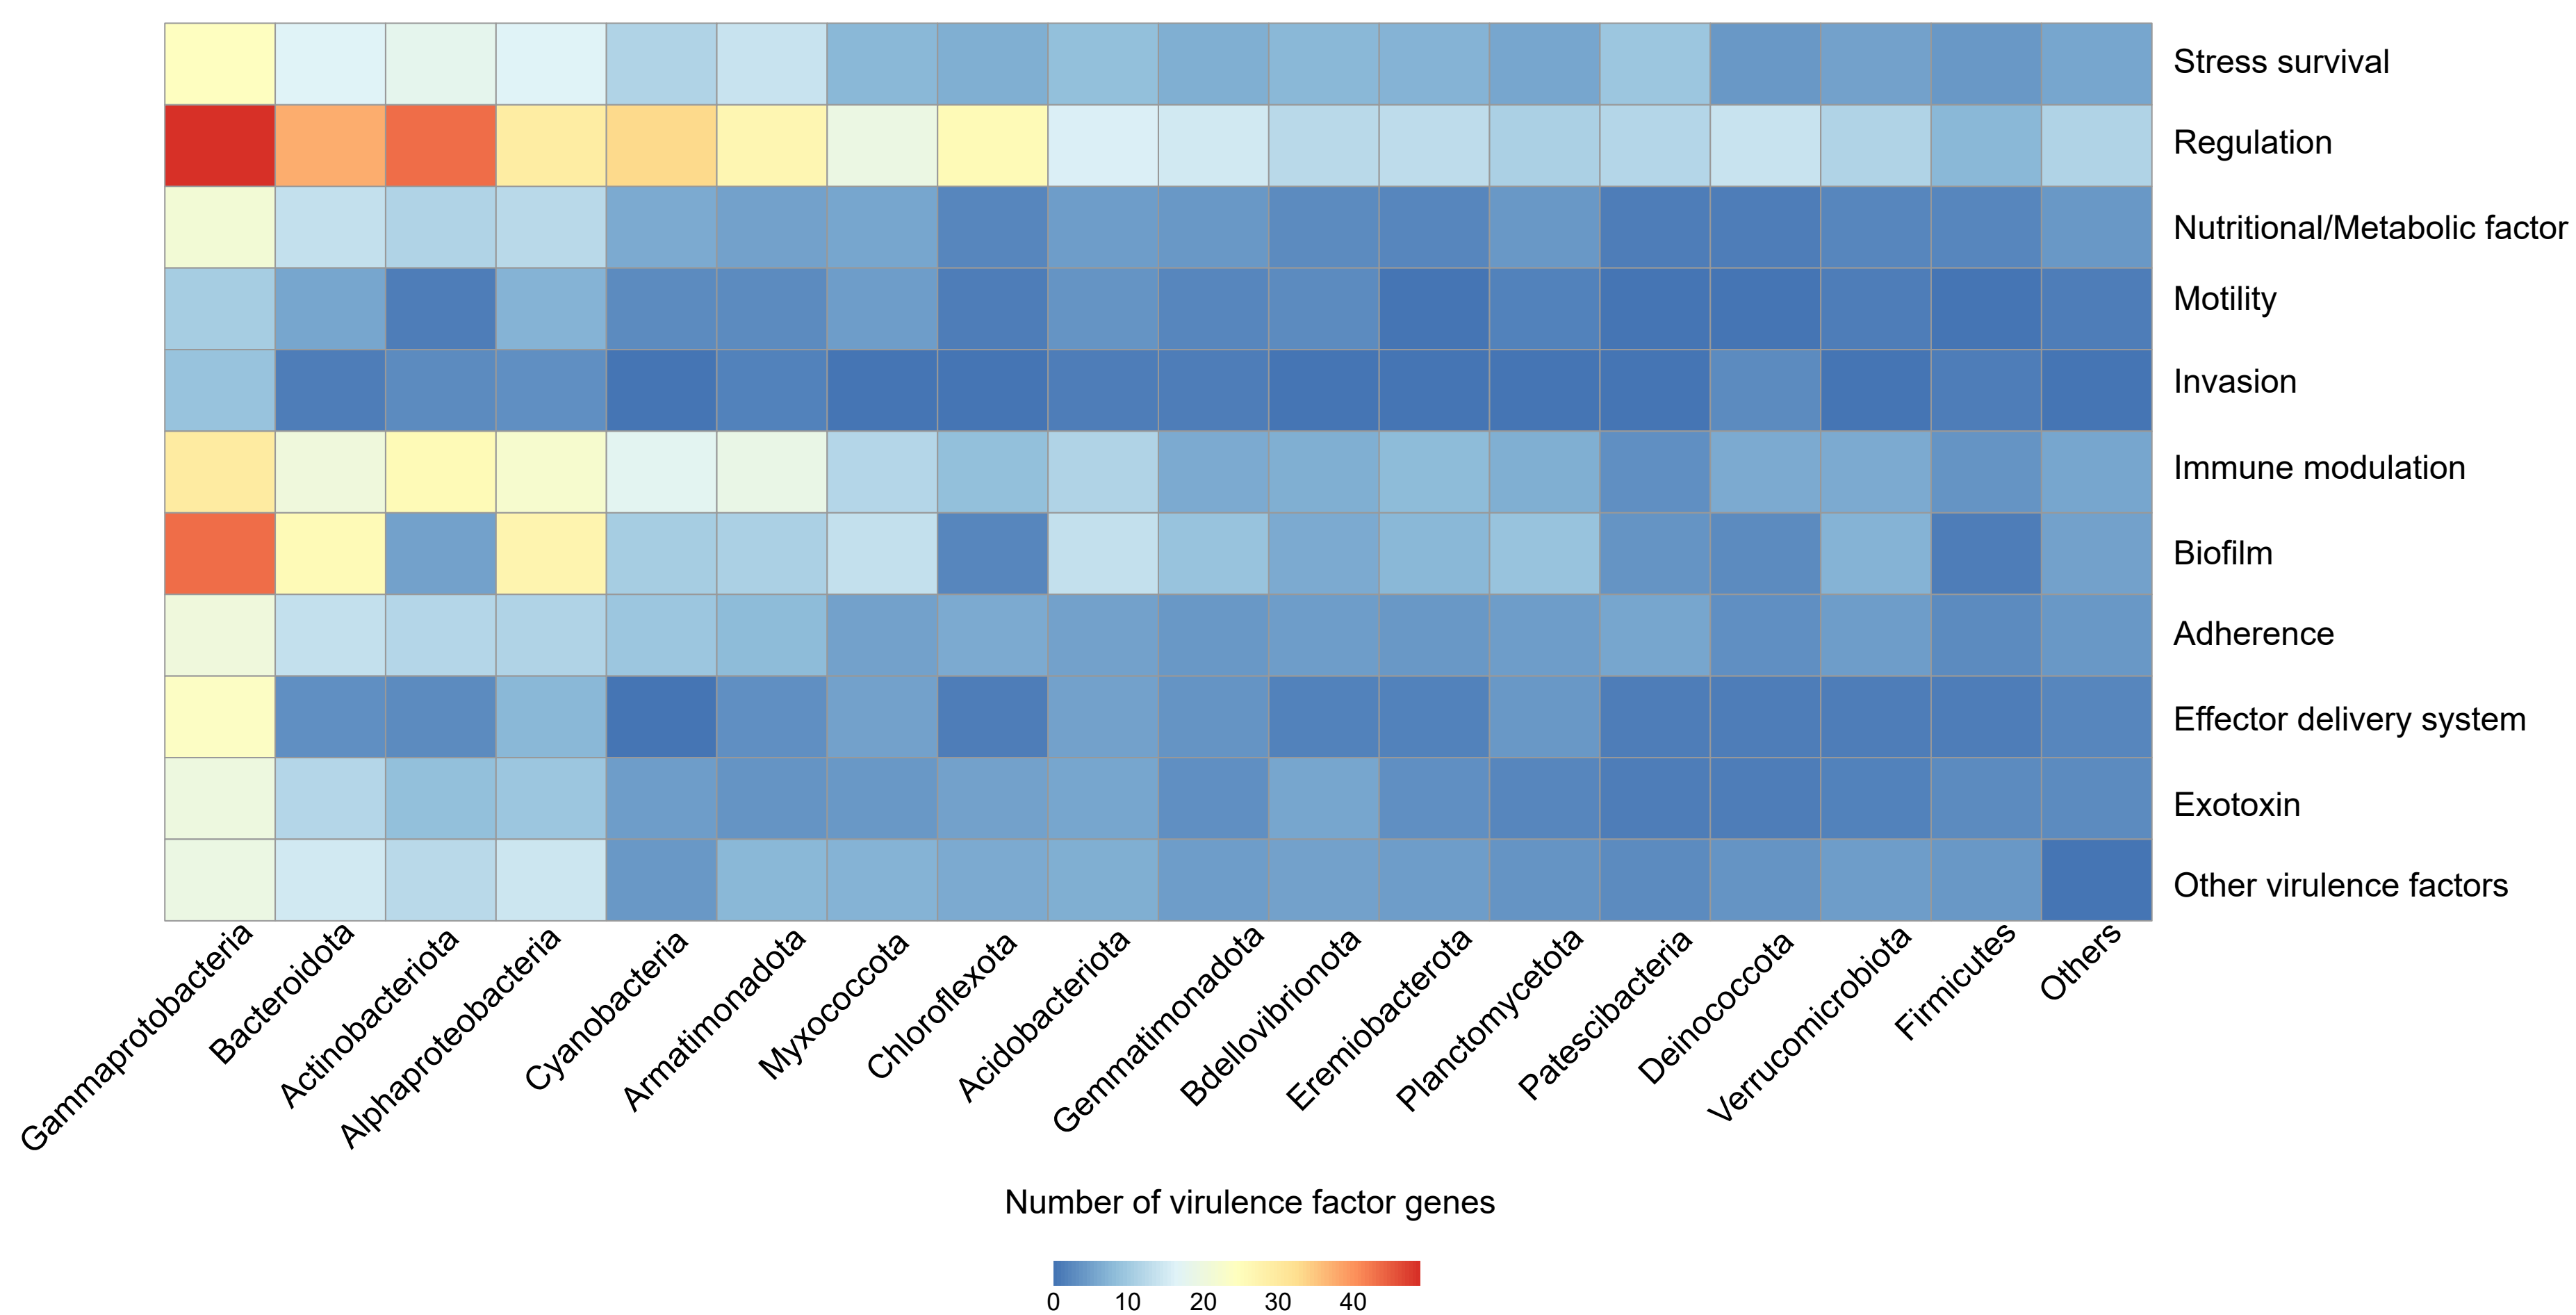

Supplement: Supplementary file [file essd-2023-395-AC3-supplement.zip]
